# Supplementary material for: Roles of Wnt Target Genes in the Journey of Cancer Stem Cells
Source: Int J Mol Sci. 2017 Jul 25;18(8):1604. doi: 10.3390/ijms18081604 (PMC5577996; doi:10.3390/ijms18081604)
Supplement: Supplementary file 1 [file ijms-18-01604-s001.xlsx]

## Sheet: Sheet1
Table S1. Wnt-target gene list
	Biological Function
Number	Initiation	Persistence	Invasion	Metastasis
1	LGR5	ABCB1	ADAM10	BMP4
2	DCLK1	ASCL2	AXL	AXL
3		AXL	BMI1	BIRC5
4		BAMBI	BMP4	BMI1
5		BCL2L2	CBS/CBSL	BMP7
6		BGLAP	CCND1	CCND1
7		BIRC5	CCR7	CD44
8		BMI1	CD44	CDKN2A
9		BMP4	CDKN2A	CLDN1
10		BMP7	CXCL12	COX2
11		CCND1	CXCR2	CXCL12
12		CCR7	CXCR4	CXCR2
13		CD44	DKK1	CXCR4
14		CDKN2A	DNMT1	DKK1
15		CTH	EDN1	DNMT1
16		CXCR4	EFNB1	EDN1
17		DKK1	EGFR	EGFR
18		DLK1	ENPP2	ENPP2
19		DNMT1	EPHB2	FN1
20		EDN1	FN1	FSCN1
21		EFNB1	FOSL1	GATA3
22		EGFR	FSCN1	GZMB
23		EGR3	GJB1	IGFBP6
24		EMP1	HAS2	IL11
25		EN2	IGFBP7	JUN
26		EPHB2	IL11	LCK
27		EPHB3	JUN	LGALS1
28		FGF18	KCNN4	MET
29		FGF4	L1CAM	MYC
30		FGF9	LCK	NES
31		FN1	LEF1	NEUROD1
32		FOSL1	LGALS1	NOS2
33		FOXG1	MET	NR3C1
34		FRA1	MMP14	PLAU
35		GATA3	MMP7	PLAUR
36		GJA1	NOS2	PRF1
37		GZMB	NRCAM	RUNX2
38		HES1	PDGFA	S100A4
39		HNF1A	PLAU	SERPINE1
40		ID2	PLAUR	SNAI1
41		IGFBP7	RUNX2	VEGFA
42		IL11	RUNX3	WNT5A
43		JAG1	S100A2	ZAP70
44		JUN	S100A4	ZNF350
45		KLF5	S100A6
46		L1CAM	SERPINE1
47		LCK	SLIT1
48		LEF1	SNAI1
49		MET	TGM2
50		MYB	TIAM1
51		MYC	TRPV2
52		NELL2	VCAN
53		NEUROD1	VEGFA
54		NEUROG1	VIM
55		NOS2	WNT5A
56		NOTCH2
57		NR3C1
58		NRCAM
59		PDGFA
60		PITX2
61		PLAU
62		PLAUR
63		PPARD
64		PRKAA2
65		PRPH
66		PTPRN2
67		RBP1
68		ROR2
69		S100A4
70		S100A6
71		SERPINE1
72		SGK1
73		SLC6A8
74		SMC3
75		SNAI1
76		SOX9
77		TGM2
78		TMEM158
79		TNFRSF1B
80		TRPV2
81		TRPV6
82		VCAN
83		VEGFA
84		VIM
85		WNT5A
